# Supplementary material for: Deep phenotyping of Alzheimer’s disease leveraging electronic medical records identifies sex-specific clinical associations
Source: PubMed Central journal article supplement (PMC8814236; doi:10.1038/s41467-022-28273-0), 2022-02-03
Supplement: 41467_2022_28273_MOESM1_ESM.pdf [file 41467_2022_28273_MOESM1_ESM.pdf]

**Deep Phenotyping of Alzheimer's Disease Leveraging Electronic  
Medical Records Identifies Sex-Specific Clinical Associations**

**Supplementary Information**

**Alice S. Tang<sup>1,2,3\*</sup>, Tomiko Oskotsky<sup>1,4</sup>, Shreyas Havaldar<sup>5</sup>, William G. Mantyh<sup>6</sup>,  
Mesude Bicak<sup>5,7</sup>, Caroline Warly Solsberg<sup>8,9,10</sup>, Sarah Woldemariam<sup>1</sup>, Billy Zeng<sup>3</sup>,  
Zicheng Hu<sup>1</sup>, Boris Oskotsky<sup>1</sup>, Dena Dubal<sup>9</sup>, Isabel E. Allen<sup>10</sup>, Benjamin S.  
Glicksberg<sup>5,7</sup>, Marina Sirota<sup>1,4\*</sup>**

## Supplementary Tables

|                           | Count         | Age                          | Death Status                                           | Race                                                                                                                                            |                                                                                          |
|---------------------------|---------------|------------------------------|--------------------------------------------------------|-------------------------------------------------------------------------------------------------------------------------------------------------|------------------------------------------------------------------------------------------|
| <b>Alzheimer's Cohort</b> | <b>6,612</b>  | <b>86.4<br/>90 (83-91)</b>   | <b>Alive: 6714 (76.3%)<br/>Deceased: 2090 (23.7%)</b>  | <b>White/Caucasian: 5462 (64.0%)<br/>Asian: 879 (10.3%)<br/>Black/African American: 586 (6.9%)<br/>Hawaiian/Pacific Islander: 452 (5.3%)</b>    | <b>American Native: 9 (.1%)<br/>Other: 743 (8.7%)<br/>Unknown/Declined: 802 (4.7%)</b>   |
| Males                     | 2,382 (36.0%) | 85.7<br>90 (84-91)           | Alive: 1778 (74.6%)<br>Deceased: 604 (25.4%)           | White/Caucasian: 1570 (66.8%)<br>Asian: 254 (10.8%)<br>Black/African American: 128 (5.4%)<br>Hawaiian/Pacific Islander: 117 (5.0%)              | Other: 209 (8.9%)<br>Unknown/Declined: 72 (3.1%)                                         |
| Females                   | 4,223 (63.9%) | 86.8<br>90 (82-91)           | Alive: 3084 (73%)<br>Deceased: 1139 (27%)              | White/Caucasian: 2525 (60.5%)<br>Asian: 497 (11.9%)<br>Black/African American: 393 (9.4%)<br>Hawaiian/Pacific Islander: 217 (5.2%)              | American Native: 8 (0.2%)<br>Other: 404 (9.7%)<br>Unknown/Declined: 130 (3.1%)           |
| Other or Unknown          | 7 (0.10%)     | 90.7<br>91 (90.5-91)         | Alive: 7 (100%)                                        | White/Caucasian: 6 (85.7%)<br>Unknown/Declined: 1 (14.3%)                                                                                       |                                                                                          |
| <b>Control Cohort</b>     | <b>13,224</b> | <b>86.2<br/>90 (83 – 91)</b> | <b>Alive: 13432 (76.3%)<br/>Deceased: 4176 (23.7%)</b> | <b>White/Caucasian: 10924 (64.0%)<br/>Asian: 1759 (10.3%)<br/>Black/African American: 1172 (6.9%)<br/>Hawaiian/Pacific Islander: 904 (5.3%)</b> | <b>American Native: 18 (.1%)<br/>Other: 1487 (8.7%)<br/>Unknown/Declined: 802 (4.7%)</b> |
| Males                     | 4,674 (35.3%) | 85.8<br>90 (82-91)           | Alive: 3248 (69.5%)<br>Deceased: 1426 (30.5%)          | White/Caucasian: 3076 (66.8%)<br>Asian: 490 (10.7%)<br>Black/African American: 277 (6.0%)<br>Hawaiian/Pacific Islander: 222 (4.8%)              | American Native: 5 (.1%)<br>Other: 384 (8.3%)<br>Unknown/Declined: 247 (3.2%)            |
| Females                   | 8,539 (64.6%) | 86.5<br>90 (84-91)           | Alive: 6253 (73.2%)<br>Deceased: 2286 (26.8%)          | White/Caucasian: 5225 (61.9%)<br>Asian: 1024 (12.1%)<br>Black/African American: 768 (9.1%)<br>Hawaiian/Pacific Islander: 387 (4.6%)             | American Native: 11 (.1%)<br>Other: 783 (9.3%)<br>Unknown/Declined: 246 (2.9%)           |
| Other or Unknown          | 11 (0.10%)    | 90.2<br>90 (90-91)           | Alive: 10 (90.9%)<br>Deceased: 1 (9.1%)                | White/Caucasian: 1 (11.1%)<br>Other: 3 (33.3%)                                                                                                  | Unknown/Declined: 5 (55.6%)                                                              |

### Supplementary Table 1. Patient Demographics with Encounter Thresholds and Controlling.

Distribution of sex, estimated age, death status, and first race among Alzheimer's and control cohorts. These cohorts are thresholded on more than 10 encounters, and over a year representation in the EMR. Patients are matched at a 1:2 Alzheimer to control ratio with the demographics shown in the table. Estimated age shows mean and median (25%ile - 75%ile).

AD (Alzheimer's disease) (HCC)  
 Alzheimer disease (HCC)  
 Alzheimer disease type 3 (HCC)  
 Alzheimer's dementia (HCC)  
 Alzheimer's dementia with behavioral disturbance (HCC)  
 Alzheimer's dementia with behavioral disturbance, unspecified timing of dementia onset (HCC)  
 Alzheimer's dementia without behavioral disturbance (HCC)  
 Alzheimer's dementia without behavioral disturbance, unspecified timing of dementia onset (HCC)  
 Alzheimer's dementia, late onset (HCC)  
 Alzheimer's dementia, late onset, with behavioral disturbance (HCC)  
 Alzheimer's disease (HCC)  
 Alzheimer's disease of other onset  
 Alzheimer's disease of other onset with behavioral disturbance (HCC)  
 Alzheimer's disease of other onset without behavioral disturbance (HCC)  
 Alzheimer's disease with delirium (HCC)  
 Alzheimer's disease with early onset (CODE) (HCC)  
 Alzheimer's disease with early onset (HCC)  
 Alzheimer's disease with late onset (CODE) (HCC)  
 Alzheimer's disease with late onset (HCC)  
 Alzheimer's disease with presenile onset (HCC)  
 Alzheimer's disease, early onset (HCC)  
 Alzheimer's disease, familial (HCC)  
 Alzheimer's disease, focal onset (HCC)  
 Alzheimer's disease, unspecified (CODE) (HCC)  
 Alzheimer's disease, unspecified (HCC)  
 Alzheimer's type dementia (HCC)  
 Alzheimer's type dementia with late onset with behavioral disturbance (HCC)  
 Alzheimer's type dementia with late onset without behavioral disturbance (HCC)  
 Alzheimers disease (HCC)  
 DAT (dementia Alzheimer type)  
 DAT (dementia of Alzheimer type) (HCC)  
 Dementia due to Alzheimer's disease (HCC)  
 Dementia in Alzheimer's disease (HCC)  
 Dementia in Alzheimer's disease with delusions (HCC)  
 Dementia in Alzheimer's disease with depression (HCC)  
 Dementia in Alzheimer's disease with early onset (HCC)  
 Dementia in Alzheimer's disease with early onset with behavioral disturbance (HCC)  
 Dementia in Alzheimer's disease with early onset without behavioral disturbance (HCC)  
 Dementia in Alzheimer's disease with early onset, with behavioral disturbance  
 Dementia in Alzheimer's disease with early onset, without behavioral disturbance  
 Dementia in Alzheimer's disease with late onset  
 Dementia of Alzheimer's type with behavioral disturbance (HCC)  
 Dementia of Alzheimer's type, with early onset, with depressed mood (HCC)  
 Dementia of the Alzheimer's type (HCC)  
 Dementia of the Alzheimer's type with early onset with behavioral disturbance (HCC)  
 Dementia of the Alzheimer's type with late onset without behavioral disturbance (HCC)  
 Dementia of the Alzheimer's type without behavioral disturbance (HCC)  
 Dementia of the Alzheimer's type, with late onset, uncomplicated (HCC)  
 Dementia of the Alzheimer's type, with late onset, with delirium (HCC)  
 Dementia of the Alzheimer's type, with late onset, with delusions (HCC)  
 Dementia of the Alzheimer's type, with late onset, with depressed mood (HCC)

Dementia of the Alzheimer's type, with late onset, with depressive mood (HCC)  
 Dementia, Alzheimer's, with behavior disturbance (HCC)  
 Early onset Alzheimer disease  
 Early onset Alzheimer's dementia without behavioral disturbance (HCC)  
 Early onset Alzheimer's disease with behavioral disturbance (HCC)  
 Family history of Alzheimer's disease  
 Focal Alzheimer's disease (HCC) 'Late onset Alzheimer disease (HCC)  
 Late onset Alzheimer's disease with behavioral disturbance (HCC)  
 Late onset Alzheimer's disease without behavioral disturbance (HCC)  
 Major neurocognitive disorder due to Alzheimer's disease (HCC)  
 Major neurocognitive disorder due to Alzheimer's disease, possible (HCC)  
 Major neurocognitive disorder due to Alzheimer's disease, probable, with behavioral disturbance (HCC)  
 Major neurocognitive disorder due to Alzheimer's disease, probable, without behavioral disturbance (HCC)  
 Major neurocognitive disorder due to Alzheimer's disease, with behavioral disturbance (HCC)  
 Major neurocognitive disorder due to possible Alzheimer's disease (HCC)  
 Major neurocognitive disorder, due to Alzheimer's disease, with behavioral disturbance, mild (HCC)  
 Major neurocognitive disorder, due to Alzheimer's disease, without behavioral disturbance, mild (HCC)  
 Major neurocognitive disorder, due to Alzheimer's disease, without behavioral disturbance, moderate (HCC)  
 Major neurocognitive disorder, due to Alzheimer's disease, without behavioral disturbance, severe (HCC)  
 Mild major neurocognitive disorder due to Alzheimer's disease with behavioral disturbance (HCC)  
 Mild major neurocognitive disorder due to Alzheimer's disease without behavioral disturbance (HCC)  
 Mild neurocognitive disorder due to Alzheimer's disease (HCC)  
 Mild possible major neurocognitive disorder due to Alzheimer's disease (HCC)  
 Mixed Alzheimer's and vascular dementia (HCC)  
 Mixed Alzheimer's and vascular dementia with behavior disturbances (HCC)  
 Moderate major neurocognitive disorder due to Alzheimer's disease without behavioral disturbance (HCC)  
 Moderate probable major neurocognitive disorder due to Alzheimer's disease with behavioral disturbance  
 Other Alzheimer's disease (HCC)  
 Possible major neurocognitive disorder due to Alzheimer's disease  
 Primary degenerative dementia of Alzheimer type (HCC)  
 Primary degenerative dementia of the Alzheimer type, senile onset (HCC)  
 Primary degenerative dementia of the Alzheimer type, senile onset, uncomplicated (HCC)  
 Primary degenerative dementia of the Alzheimer type, senile onset, with depression (HCC)  
 Probable major neurocognitive disorder due to Alzheimer's disease with behavioral disturbance  
 Probable major neurocognitive disorder due to Alzheimer's disease without behavioral disturbance  
 Progressive aphasia in Alzheimer's disease (HCC)  
 SDAT (senile dementia of Alzheimer's type) (HCC)  
 Senile dementia of Alzheimer's type (HCC)  
 Sporadic Alzheimer's disease (HCC)

**Supplementary Table 2. UMAP Exclusion Terms**

Table of diagnosis excluded in UMAP embedding. These terms contain the word 'Alzheimer'.

| UCSF: Graph (>1%)        | Number       |              | Avg Number           |                  | Network Diameter |                            | Network Radius         |                 | Characteristic Path Length | Clustering Coefficient | Network density      |                | Network heterogeneity |            | Network Centralization |  | Connected Components |  |
|--------------------------|--------------|--------------|----------------------|------------------|------------------|----------------------------|------------------------|-----------------|----------------------------|------------------------|----------------------|----------------|-----------------------|------------|------------------------|--|----------------------|--|
|                          | Nodes        | Edges        | Neighbors            | Neighbors        | Diameter         | Radius                     | Path Length            | density         |                            |                        | heterogeneity        | Centralization | Components            | Singletons |                        |  |                      |  |
| ADDiagnosisNameAll       | 1056         | 27504        | 62.15                |                  | 4                | 4                          | 2                      | 2.043           | 0.830                      | 0.070                  | 1.626                | 0.763          | 0.763                 | 171        | 169                    |  |                      |  |
| ADDiagnosisNameFemale    | 962          | 25459        | 61.64                |                  | 4                | 4                          | 2                      | 2.038           | 0.832                      | 0.075                  | 1.586                | 0.761          | 0.761                 | 137        | 136                    |  |                      |  |
| ADDiagnosisNameMale      | 924          | 20102        | 52.90                |                  | 4                | 2                          | 2                      | 2.057           | 0.823                      | 0.070                  | 1.633                | 0.739          | 0.739                 | 164        | 162                    |  |                      |  |
| ADL3NameAll              | 483          | 23505        | 97.33                |                  | 2                | 2                          | 1                      | 1.798           | 0.899                      | 0.202                  | 1.054                | 0.801          | 0.801                 | 1          | 0                      |  |                      |  |
| ADL3NameFemale           | 452          | 21958        | 97.16                |                  | 2                | 2                          | 1                      | 1.785           | 0.899                      | 0.215                  | 1.021                | 0.788          | 0.788                 | 1          | 0                      |  |                      |  |
| ADL3NameMale             | 445          | 20099        | 90.33                |                  | 2                | 2                          | 1                      | 1.797           | 0.899                      | 0.203                  | 1.046                | 0.800          | 0.800                 | 1          | 0                      |  |                      |  |
| ADL2NameAll              | 165          | 7960         | 96.48                |                  | 2                | 2                          | 1                      | 1.412           | 0.896                      | 0.588                  | 0.479                | 0.417          | 0.417                 | 1          | 0                      |  |                      |  |
| ADL2NameFemale           | 160          | 7531         | 94.73                |                  | 2                | 2                          | 1                      | 1.400           | 0.897                      | 0.600                  | 0.469                | 0.406          | 0.406                 | 2          | 1                      |  |                      |  |
| ADL2NameMale             | 158          | 7257         | 91.86                |                  | 2                | 2                          | 1                      | 1.415           | 0.892                      | 0.585                  | 0.481                | 0.420          | 0.420                 | 1          | 0                      |  |                      |  |
| ConDiagnosisNameAll      | 421          | 2445         | 18.04                |                  | 4                | 4                          | 2                      | 2.048           | 0.738                      | 0.067                  | 1.671                | 0.843          | 0.843                 | 151        | 150                    |  |                      |  |
| ConDiagnosisNameFemale   | 167          | 2109         | 25.72                |                  | 3                | 3                          | 2                      | 1.892           | 0.848                      | 0.158                  | 1.156                | 0.797          | 0.797                 | 4          | 3                      |  |                      |  |
| ConDiagnosisNameMale     | 321          | 1417         | 13.43                |                  | 4                | 4                          | 2                      | 2.078           | 0.681                      | 0.064                  | 1.717                | 0.815          | 0.815                 | 111        | 110                    |  |                      |  |
| ConL3NameAll             | 318          | 5772         | 43.89                |                  | 2                | 2                          | 1                      | 1.832           | 0.760                      | 0.168                  | 1.135                | 0.839          | 0.839                 | 56         | 55                     |  |                      |  |
| ConL3NameFemale          | 190          | 5434         | 57.20                |                  | 2                | 2                          | 1                      | 1.697           | 0.830                      | 0.303                  | 0.829                | 0.705          | 0.705                 | 1          | 0                      |  |                      |  |
| ConL3NameMale            | 282          | 4195         | 37.46                |                  | 3                | 3                          | 2                      | 1.837           | 0.750                      | 0.168                  | 1.125                | 0.835          | 0.835                 | 59         | 58                     |  |                      |  |
| ConL2NameAll             | 150          | 3990         | 55.80                |                  | 2                | 2                          | 1                      | 1.607           | 0.854                      | 0.393                  | 0.697                | 0.616          | 0.616                 | 8          | 7                      |  |                      |  |
| ConL2NameFemale          | 122          | 3760         | 61.64                |                  | 2                | 2                          | 1                      | 1.491           | 0.866                      | 0.509                  | 0.552                | 0.499          | 0.499                 | 1          | 0                      |  |                      |  |
| ConL2NameMale            | 137          | 3200         | 48.48                |                  | 2                | 2                          | 1                      | 1.630           | 0.862                      | 0.370                  | 0.726                | 0.640          | 0.640                 | 6          | 5                      |  |                      |  |
| Mount Sinai: Graph (>1%) | Number Nodes | Number Edges | Avg Number Neighbors | Network Diameter | Network Radius   | Characteristic Path Length | Clustering Coefficient | Network density | Network heterogeneity      | Network Centralization | Connected Components | Singletons     |                       |            |                        |  |                      |  |
| ADDiagnosisNameAll       | 483          | 1788         | 15.96                |                  | 4                | 4                          | 2                      | 2.030           | 0.782                      | 0.072                  | 1.696                | 0.756          | 0.756                 | 260        | 259                    |  |                      |  |
| ADDiagnosisNameFemale    | 482          | 1753         | 15.72                |                  | 4                | 4                          | 2                      | 2.035           | 0.769                      | 0.071                  | 1.700                | 0.751          | 0.751                 | 260        | 259                    |  |                      |  |
| ADDiagnosisNameMale      | 446          | 1034         | 12.16                |                  | 4                | 2                          | 2                      | 2.084           | 0.722                      | 0.072                  | 1.674                | 0.700          | 0.700                 | 277        | 276                    |  |                      |  |
| ADL3NameAll              | 348          | 10434        | 59.97                |                  | 2                | 2                          | 1                      | 1.827           | 0.910                      | 0.173                  | 1.152                | 0.832          | 0.832                 | 1          | 0                      |  |                      |  |
| ADL3NameFemale           | 352          | 10145        | 59.68                |                  | 2                | 2                          | 1                      | 1.824           | 0.909                      | 0.176                  | 1.142                | 0.829          | 0.829                 | 13         | 12                     |  |                      |  |
| ADL3NameMale             | 332          | 8162         | 52.32                |                  | 2                | 2                          | 1                      | 1.832           | 0.905                      | 0.168                  | 1.166                | 0.837          | 0.837                 | 21         | 20                     |  |                      |  |
| ADL2NameAll              | 141          | 4625         | 65.60                |                  | 2                | 2                          | 1                      | 1.531           | 0.875                      | 0.469                  | 0.608                | 0.539          | 0.539                 | 1          | 0                      |  |                      |  |
| ADL2NameFemale           | 141          | 4480         | 64.93                |                  | 2                | 2                          | 1                      | 1.526           | 0.876                      | 0.474                  | 0.602                | 0.534          | 0.534                 | 4          | 3                      |  |                      |  |
| ADL2NameMale             | 139          | 4037         | 59.37                |                  | 2                | 2                          | 1                      | 1.560           | 0.878                      | 0.440                  | 0.642                | 0.569          | 0.569                 | 4          | 3                      |  |                      |  |
| ConDiagnosisNameAll      | 461          | 13           | 3.25                 |                  | 3                | 3                          | 2                      | 1.607           | 0.558                      | 0.464                  | 0.527                | 0.524          | 0.524                 | 454        | 453                    |  |                      |  |
| ConDiagnosisNameFemale   | 461          | 13           | 3.25                 |                  | 3                | 3                          | 2                      | 1.607           | 0.558                      | 0.464                  | 0.527                | 0.524          | 0.524                 | 454        | 453                    |  |                      |  |
| ConDiagnosisNameMale     | 423          | 13           | 3.25                 |                  | 3                | 3                          | 2                      | 1.607           | 0.558                      | 0.464                  | 0.527                | 0.524          | 0.524                 | 416        | 415                    |  |                      |  |
| ConL3NameAll             | 347          | 1038         | 17.16                |                  | 2                | 2                          | 1                      | 1.857           | 0.788                      | 0.143                  | 1.267                | 0.871          | 0.871                 | 227        | 226                    |  |                      |  |
| ConL3NameFemale          | 351          | 1038         | 17.16                |                  | 2                | 2                          | 1                      | 1.857           | 0.788                      | 0.143                  | 1.267                | 0.871          | 0.871                 | 231        | 230                    |  |                      |  |
| ConL3NameMale            | 331          | 980          | 16.47                |                  | 3                | 3                          | 2                      | 1.863           | 0.780                      | 0.140                  | 1.280                | 0.867          | 0.867                 | 213        | 212                    |  |                      |  |
| ConL2NameAll             | 141          | 1323         | 32.67                |                  | 3                | 3                          | 2                      | 1.594           | 0.877                      | 0.408                  | 0.677                | 0.568          | 0.568                 | 61         | 60                     |  |                      |  |
| ConL2NameFemale          | 141          | 1323         | 32.67                |                  | 3                | 3                          | 2                      | 1.594           | 0.877                      | 0.408                  | 0.677                | 0.568          | 0.568                 | 61         | 60                     |  |                      |  |
| ConL2NameMale            | 139          | 1290         | 31.85                |                  | 3                | 3                          | 2                      | 1.606           | 0.865                      | 0.398                  | 0.690                | 0.566          | 0.566                 | 59         | 58                     |  |                      |  |





### **Supplementary Table 3. All Diagnosis Network Metrics**

An attached excel sheet with 3 tabs. **Tab 1:** Diagnosis Networks are created with nodes representing a diagnostic category or diagnosis shared among >1% of patients in a group, and edges representing >1% of co-diagnosis in a group. **Tab 2 (UCSF) and 3 (Mount Sinai):** Network metrics are computed for nodes in each network, and the distribution of metrics are compared between networks. Comparisons are performed with and without the removal of singletons (single nodes with no neighbors). A Mann-Whitney U-test is performed to compare the distribution of each network metric, with colors based upon p-value cutoff. The mean difference in metric between comparison groups is also shown.

# Supplementary Figures

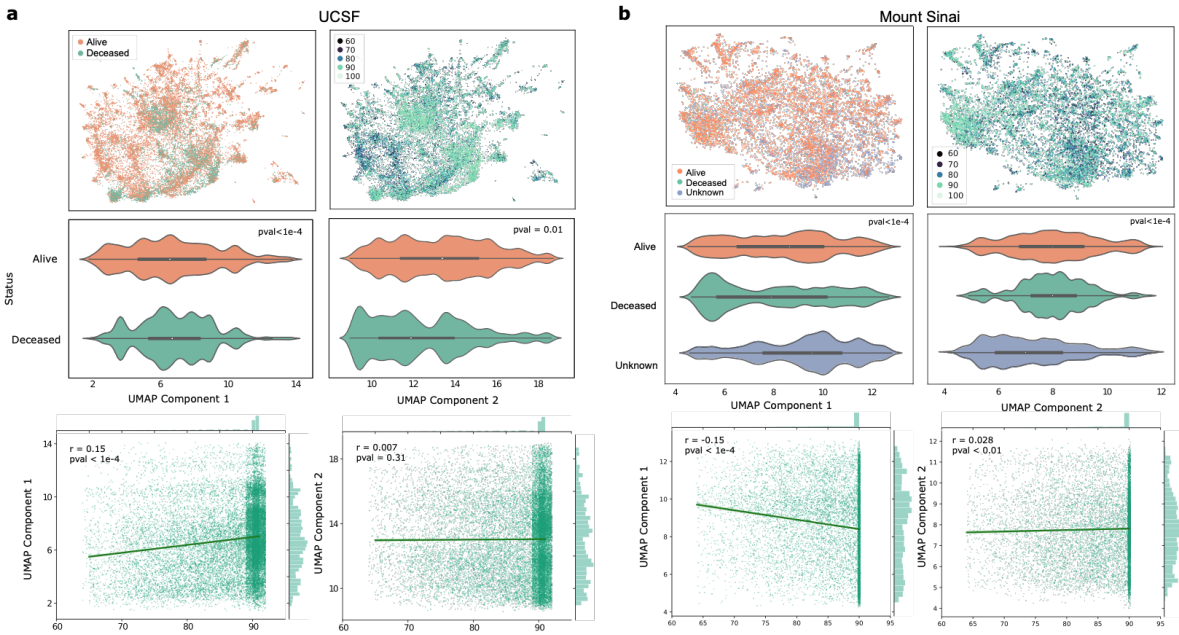

**Supplementary Figure 1. Demographic correlation across UMAP principal components.**

- a. The top two graphs show the UMAP of AD and control cohorts at UCSF, colored by deceased status (left) and estimated age (right). The middle graphs show distribution of deceased status among the two UMAP components, which are compared with a two-sided Mann-Whitney U-Test. The bottom graphs show estimated age across the two UMAP components, with marginal distributions shown on the sides. A regression line is plotted, and a Pearson’s R correlation test is performed.
- b. The same UMAP plots are shown as in **a**, but for Mount Sinai.



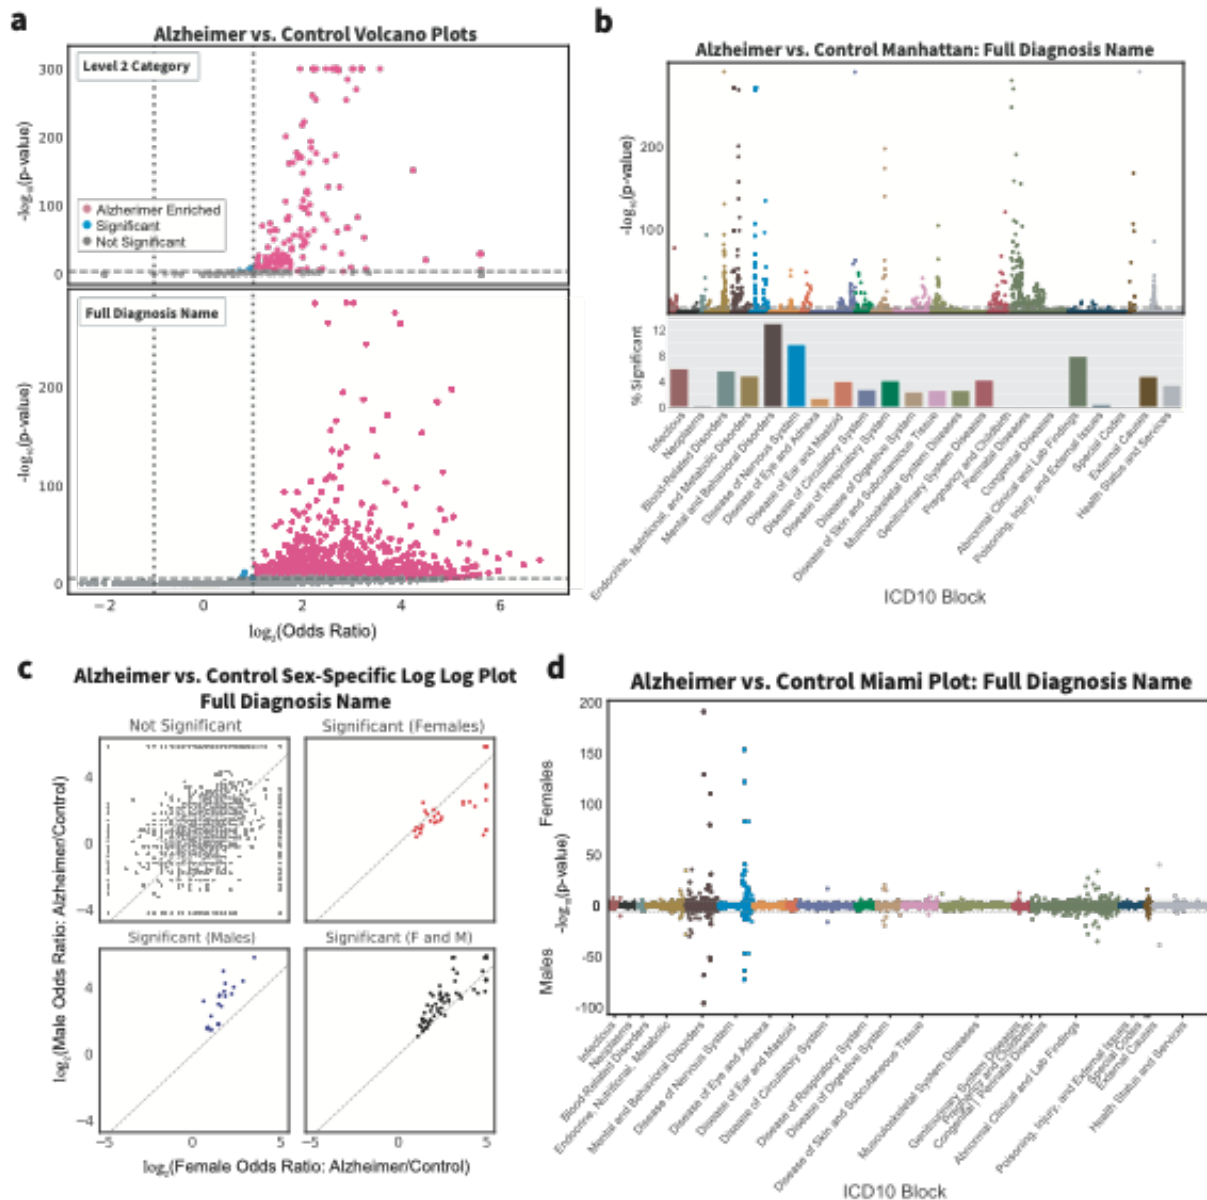

**Supplementary Figure 2. Comorbidity Enrichment Analysis identifies enriched diagnosis in Patients with AD vs. Controls and Sex-Specific Enrichments at Mount Sinai.**

- Volcano plot for Level 2 categories (top) and full diagnosis names (bottom) compared between AD and control cohorts using two-sided Fisher Exact or Chi-Squared test. P-value cutoff is Bonferroni corrected at 0.05 with log2 odds ratio cutoff at 1 for AD enriched (pink)

and remaining significant diagnoses in blue.

- b. Above, a Manhattan plot with full diagnosis names colored by ICD-10-CM categories with significance determined by two-sided Fisher Exact or Chi Square Test with Bonferroni-corrected p-value cutoff of 0.05. Bottom, percentage of diagnosis in each ICD-10-CM category that is significant.
- c. Full diagnosis names compared between patients with AD and controls within each sex. The log of the odds ratio is plotted on the axis, and points are colored by significance (two-sided Fisher Exact or Chi Square test with Bonferroni-corrected p-value cutoff of 0.05).
- d. Miami plot of the diagnosis names grouped by sex and ICD-10-CM categories.

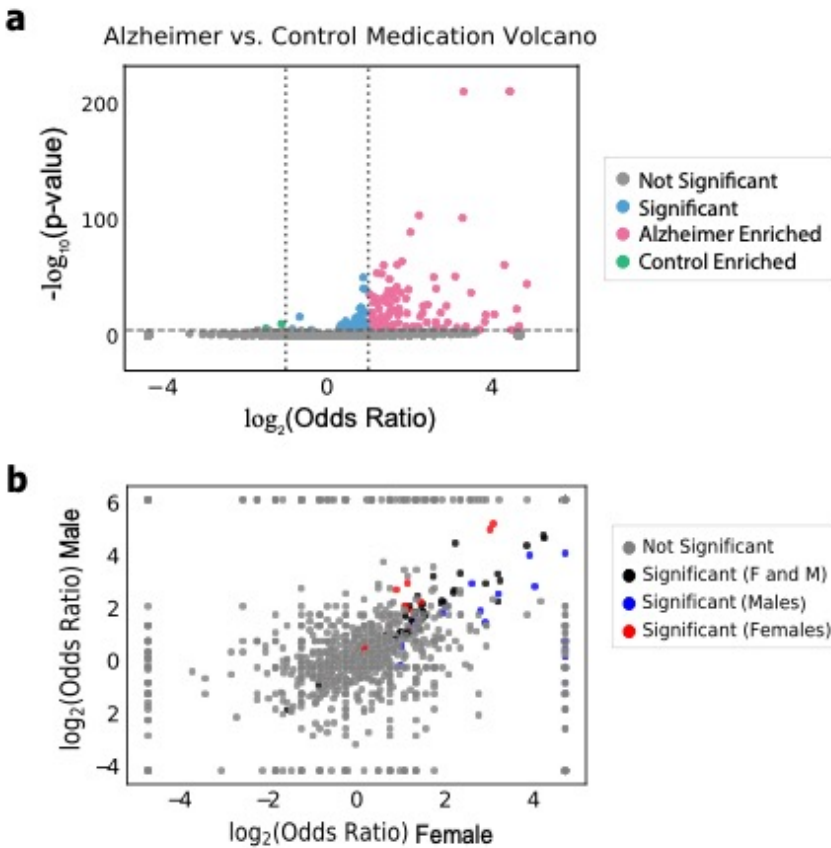

**Supplementary Figure 3. Medication Enrichment Analysis identifies Enriched Medications between AD and Control Cohorts.**

- a. Volcano plot for generic medication names compared between patients with AD and controls using two-sided Fisher Exact or Chi-Squared Test. P-value cutoff is Bonferroni-corrected at 0.05 with odds ratio cutoff at 2 for AD enriched (pink) or 1/2 for controlled enriched (green). Remaining significant diagnoses are in blue.
- b. Log-log plot of generic medication names compared between patients with AD and controls within each sex. The log of the odds ratio for each sex is plotted on the axis, with points colored by significance (Bonferroni-corrected p-value of 0.05) if female only (red), male only (blue), or both (black).

**a** UCSF Significant Median Lab Values

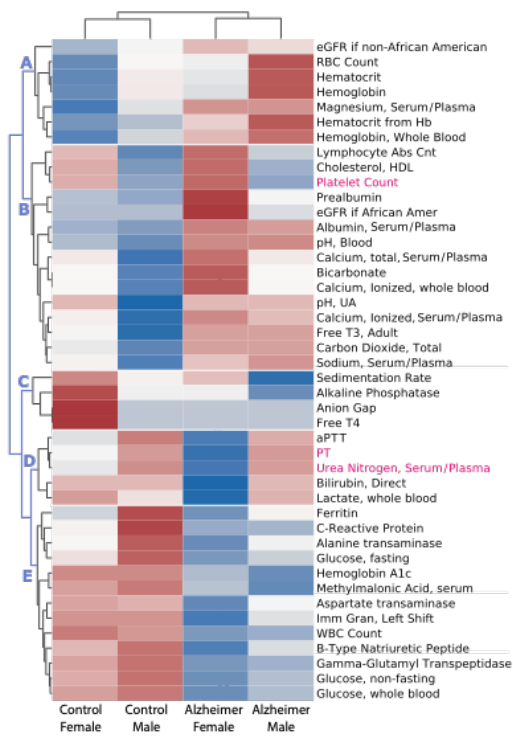

Mount Sinai Significant Median Labs

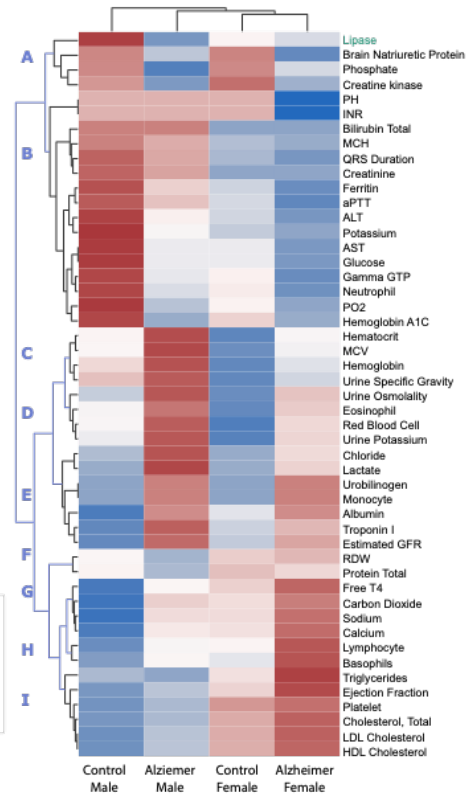

**b**

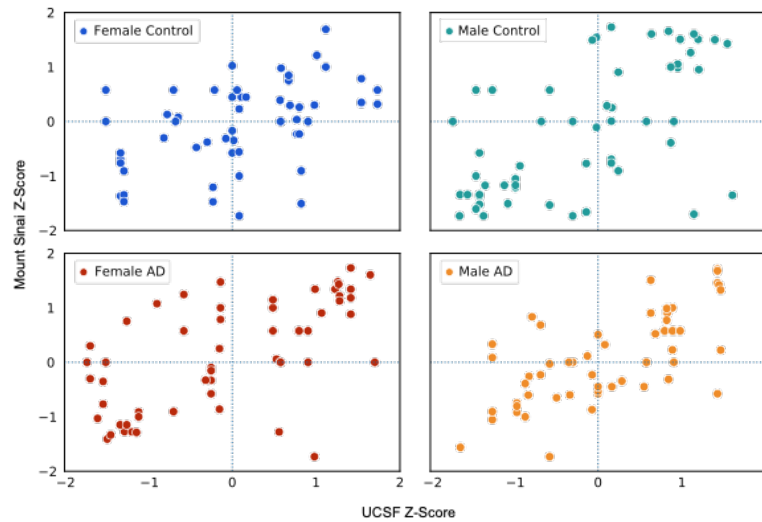

**Supplementary Figure 4. Stratifying by AD status and sex allows identification of lab trends between groups.**

a. Heatmap of lab values filtered on significance at UCSF in AD vs control comparison across

sex-specific groups. Labs are clustered with light blue lines representing significant cluster breaks (FWER corrected p-value 0.05). Text color represents significant labs among females only (pink), or significant between patients with AD vs control patients (black). Heatmap colors represent z-score of the average median value across the 4 groups.

- b. Heatmap of lab values filtered on significance at Mount Sinai in AD vs control comparison across sex-specific groups. Labs are clustered with light blue lines representing significant cluster breaks (FWER corrected p-value 0.05). Text color represents significant labs among males only (green), or significant between patients with AD vs control patients (black). Heatmap colors represent z-score of the average median value across the 4 groups.
- c. Comparison of z-scored lab values between UCSF and Mount Sinai showing significant correlations within each AD/sex-stratified groups. Female control: Spearman  $\rho = 0.45$ , p-value  $< 0.001$ ; Male control:  $0.46$ , p-value  $< 0.001$ ; Females with AD:  $0.59$ , p-value  $< 1e-5$ ; Males with AD:  $0.64$ , p-value  $< 1e-5$ .
