# Supplementary material for: Deep phenotyping of Alzheimer’s disease leveraging electronic medical records identifies sex-specific clinical associations
Source: PubMed Central journal article supplement (PMC8814236; doi:10.1038/s41467-022-28273-0), 2022-02-03
Supplement: 41467_2022_28273_MOESM3_ESM.pdf [file 41467_2022_28273_MOESM3_ESM.pdf]

**Title: Supplementary Data 1.**

**Description: Thresholded Full Tables of Diagnosis Enrichment Analysis.**

An excel sheet with 3 levels of diagnosis categories and sex-specific analysis (6 tabs) for each institution (12 tabs total). Lists include diagnosis enriched between AD and control cohorts, and sex-specific enrichments. Diagnoses are thresholded to represent > 10 patients, with un-corrected p-values (from two-sided Fisher Exact or Chi Square test) and odds ratios. The data from UCSF can be visualized and explored in the Rshiny app: [vizad.org](http://vizad.org).

**Title: Supplementary Data 2.**

**Description: Encounter Controlled Diagnosis Enrichment Analysis.**

An excel sheets with 3 levels of diagnosis categories on encounter-controlled control cohorts (described in Methods) and sex-specific analysis at UCSF (6 tabs). Lists include diagnoses enriched between AD and control cohorts, and sex-specific enrichments. Diagnoses are thresholded to represent > 10 patients, with un-corrected p-values (from two-sided Fisher Exact or Chi Square test) and odds-ratios. The data can be visualized and explored in the Rshiny app: [vizad.org](http://vizad.org).
